# Supplementary material for: Anti-BACE1 and Antimicrobial Activities of Steroidal Compounds Isolated from Marine Urechis unicinctus
Source: Mar Drugs. 2018 Mar 14;16(3):94. doi: 10.3390/md16030094 (PMC5867638; doi:10.3390/md16030094)
Supplement: Supplementary file 1 [file marinedrugs-16-00094-s001.docx]

**Supplentary materials**

**Anti-BACE1 and Antimicrobial Activities of Steroidal Compounds Isolated from Marine *Urechis unichinctus***

Yong-Zhe Zhu†, Jing-Wen Liu†, Xue Wang‡, In-Hong Jeong§, Young-Joon Ahn⊥, Chuan-Jie Zhang║,*

†College of Chemistry and Pharmaceutical Science, Qingdao Agricultural University, Changcheng Rd, Chengyang district, Qingdao, Shandong, 266109, China

‡School of Pharmaceutical Sciences, Wenzhou Medical University, Wenzhou, Zhejiang, 325035, China

§Division of Crop Protection, National Institute of Agricultural Science, Rural Development Administration, Jeollabuk-do 55365, Republic of Korea

⊥Department of Agricultural Biotechnology, Seoul National University, 599 Gwanak-ro, Silim-dong, Gwanak-Gu, Seoul, 151742, Republic of Korea

║Department of Plant Science, University of Connecticut, 1376 Storrs Road, U-4163, Storrs, CT 06269, United State


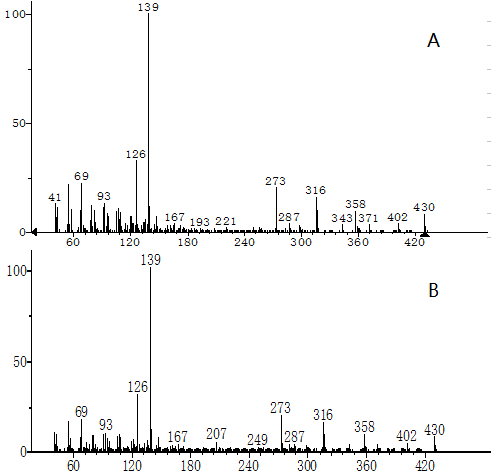


**Figure S1.** Known hecogenin in NIST11 database (A) and EI-MS (70 ev) spectrum of PS-1 (B).


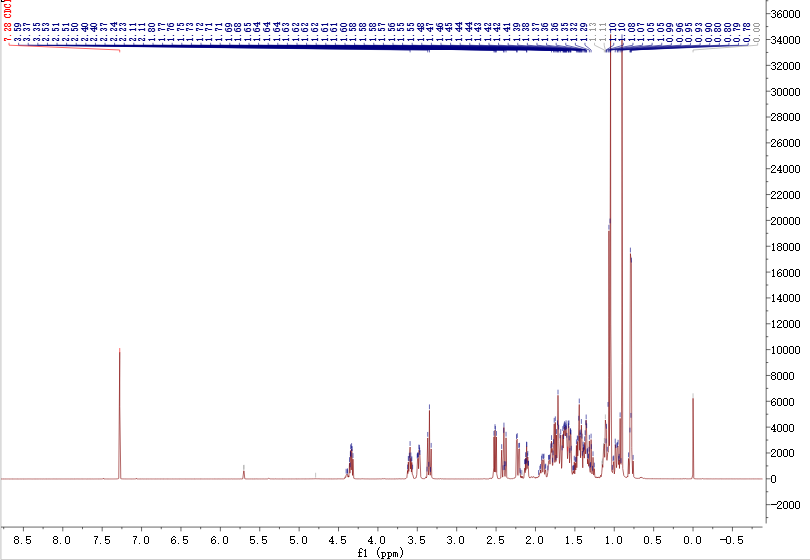


**Figure S2.** 1H NMR (CDCl3, 500 MHz) spectrum of PS-1.


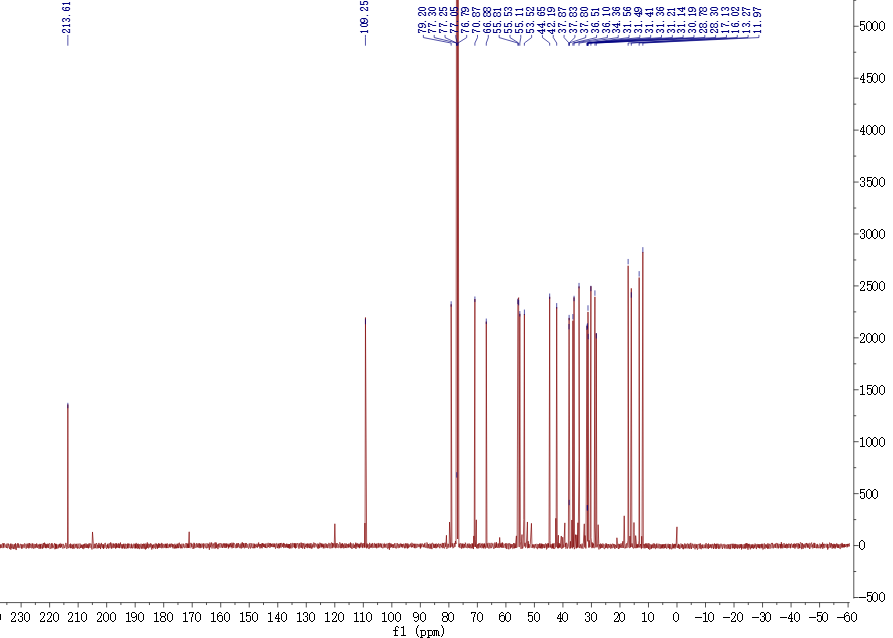


**Figure S3.** 13C NMR (CDCl3, 125 MHz) spectrum of PS-1.


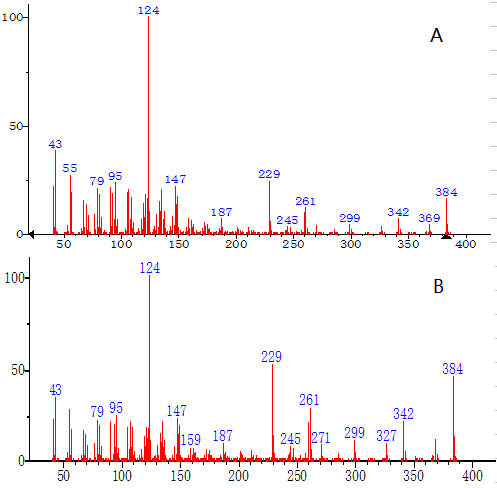
 **S3 Figure S4.** Known cholest-4-*en*-3-one in NIST11 database (A) and EI-MS (70 ev) spectrum of PS-2 (B).


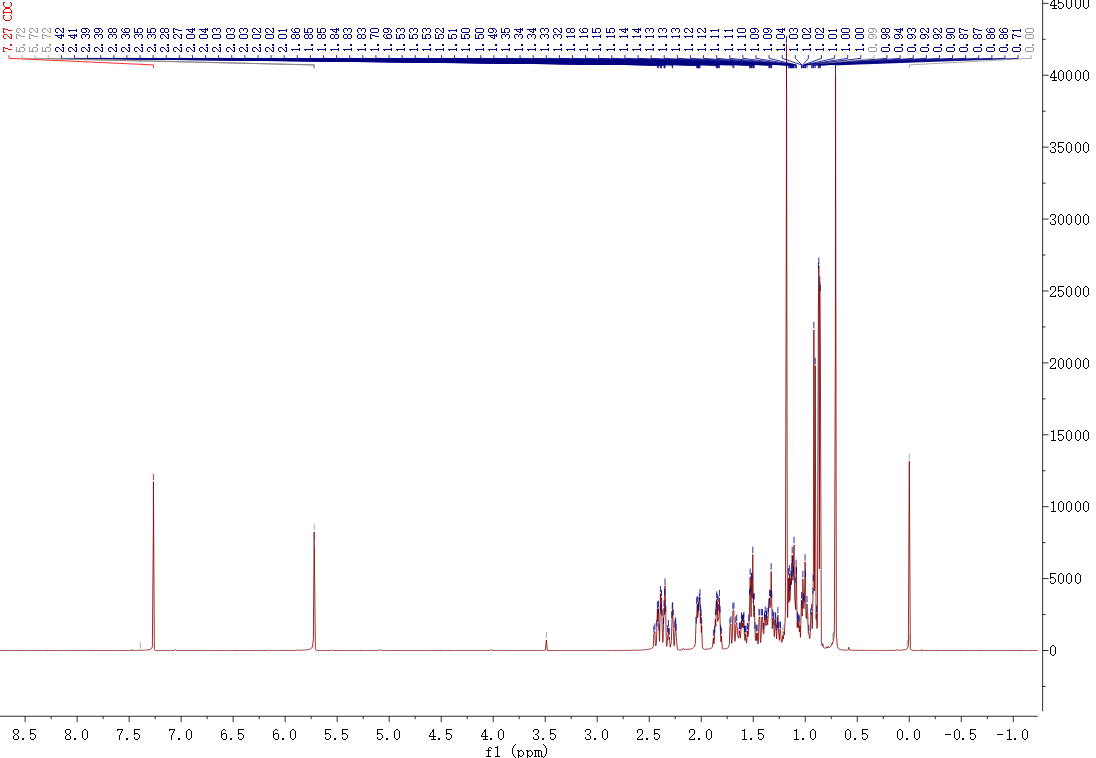
 **Figure S5.** 1H NMR (CDCl3, 500 MHz) spectrum of PS-2.


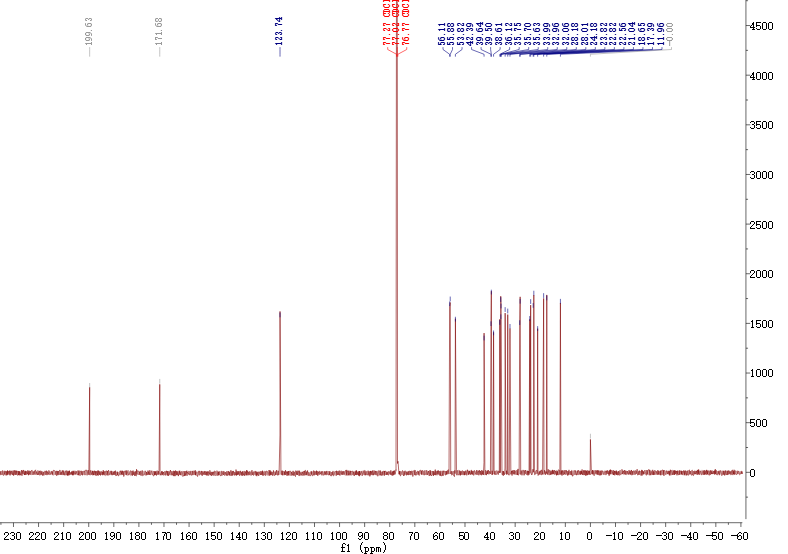


**Figure S6.** 13C NMR (CDCl3, 125 MHz) spectrum of PS-2.


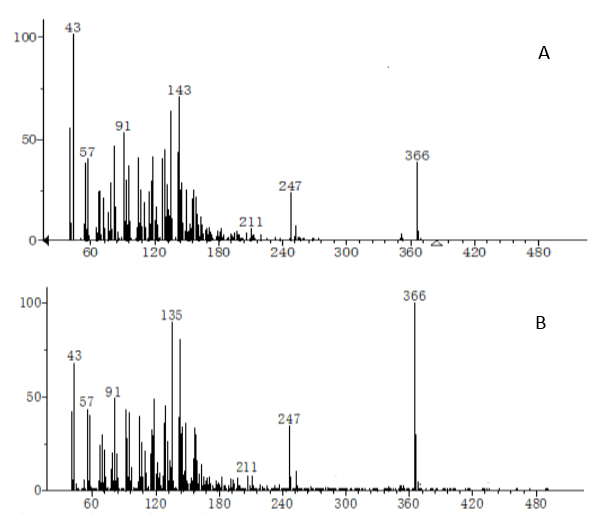


**Figure S7.** Known cholesta-4,6-*dien*-3-ol in NIST11 database (A) and EI-MS (70 ev) spectrum of PS-3 (B).


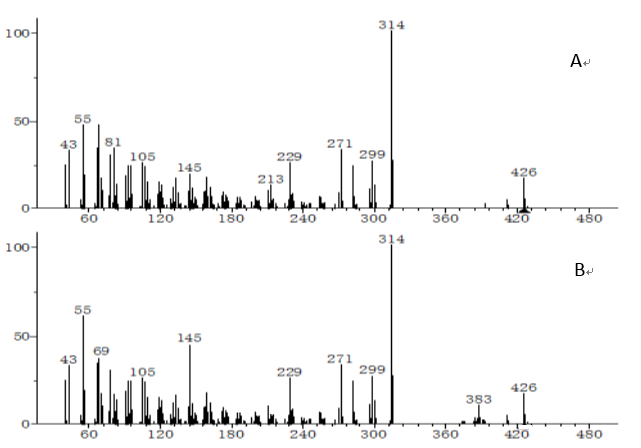


**Figure S8.** Known hurgadacin in NIST11 database (A) and EI-MS (70 ev) spectrum of PS-4 (B).


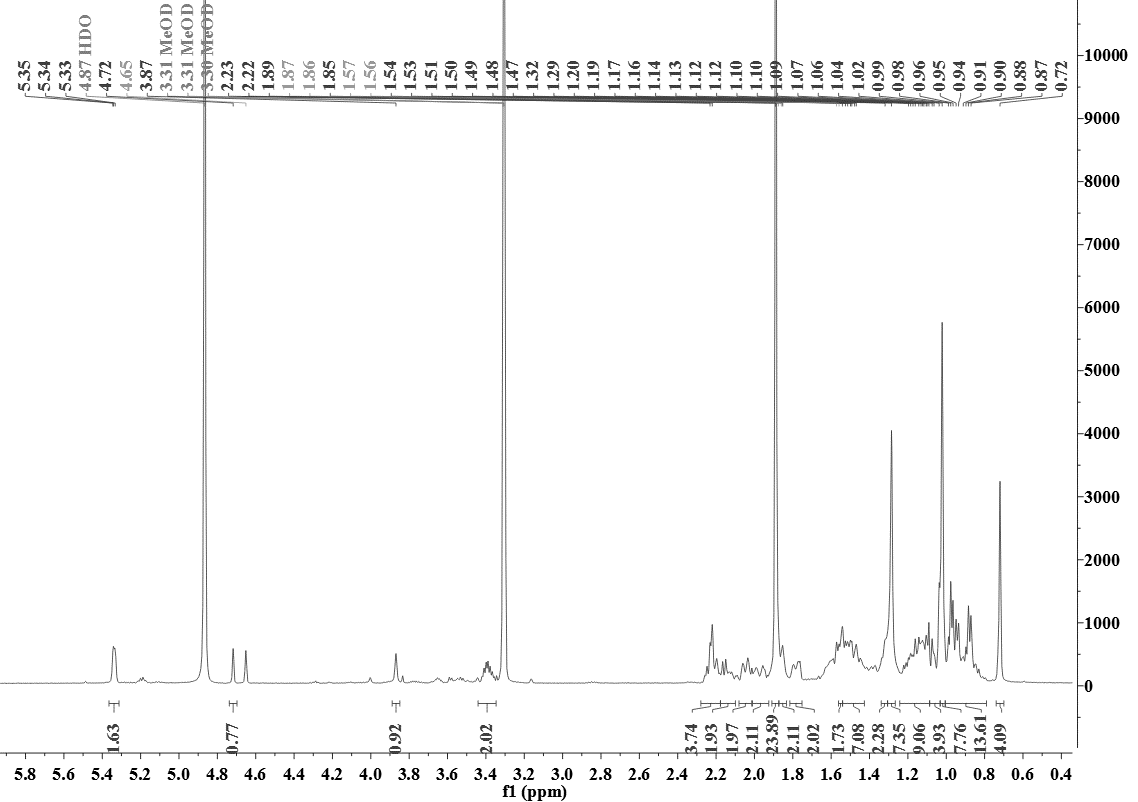
 **Figure S9.** 1H NMR (MeOD, 500 MHz) spectrum of PS-4.
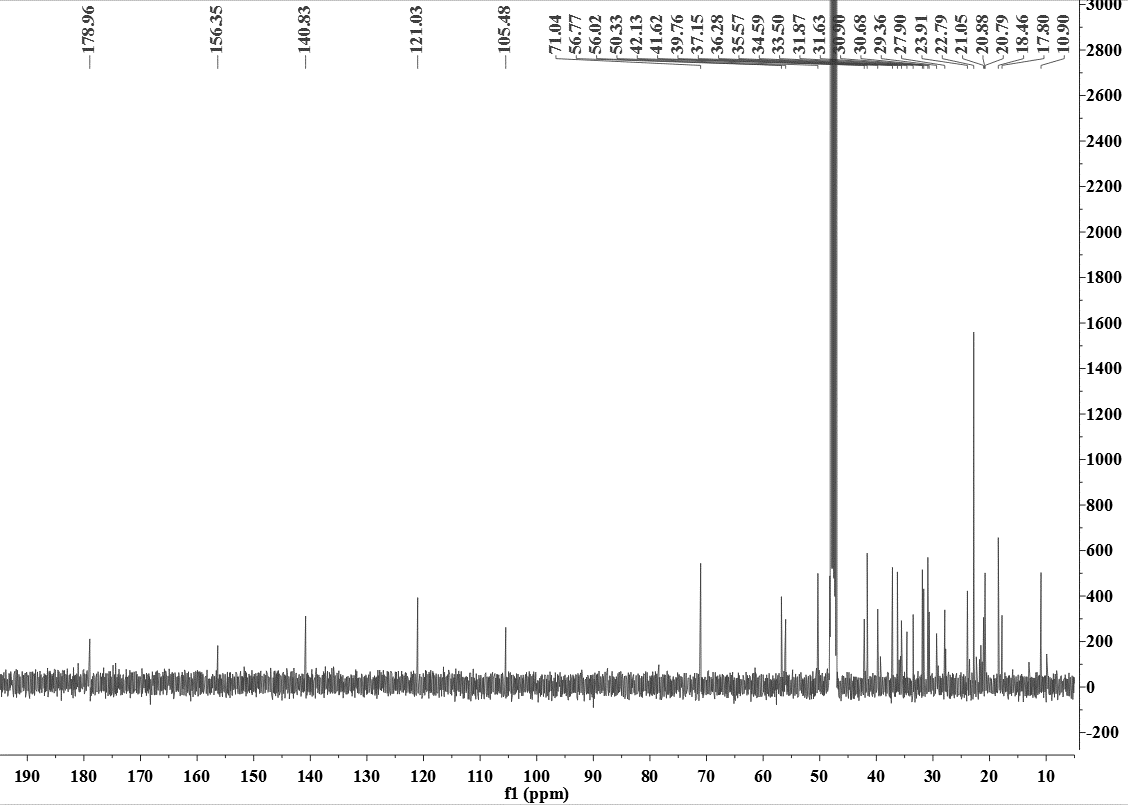


**Figure S10.** 13C NMR (MeOD, 125 MHz) spectrum of PS-4.

**Table S1.** Summary of BACE1 inhibitory activity (% inhibition, ± standard error) of chloroform-soluble fractions.

| Materials | % Inhibition | | | |
| --- | --- | --- | --- | --- |
| 0.25 (mg/mL) | 0.5 (mg/mL) | 1.0 (mg/mL) | 2.0 (mg/mL) |
| Curcuminoids a | -b | 88.03±0.34 | 93.21±0.52 | 98.51±0.12 |
| C1 | - | 0 | 0 | 0 |
| C2 | - | 4.32±0.15 | 6.94±2.27 | 10.07±1.21 |
| C3 | - | 40.12±0.18 | 46.65±0.26 | 52.11±0.47 |
| C4 | - | 41.21±1.79 | 46.58±1.64 | 61.05±0.22 |
| C5* | - | 75.06±0.72 | 87.47±1.12 | 94.15±1.43 |
| C6* | - | 90.03±0.51 | 94.12±0.98 | 100.00±0.72 |
| C7 | - | 40.12±1.37 | 53.10±0.64 | 61.15±0.17 |
| C6-1 | - | - | 49.34±0.19 | - |
| C6-2 | - | - | 39.44±1.46 | - |
| C6-3 | - | - | 48.96±0.57 | - |
| C6-4* | - | - | 100.00±1.12 | - |
| C6-5 | - | - | 75.13±0.93 | - |
| C6-6 | - | - | 29.42±0.28 | - |
| C6-4-1 | 57.49±0.77 | 67.23±0.14 | - | - |
| C6-4-2 | 46.93±0.24 | 53.05±0.19 | - | - |
| C6-4-3* | 98.84±0.15 | 100.00±0.10 | - | - |
| C6-4-4 | 70.24±0.18 | 76.56±0.09 | - | - |
| C6-4-5 | 48.26±0.20 | 57.14±0.11 | - | - |
| C5-1 | - | 0 | 0 | 6.58±0.27 |
| C5-2 | - | 4.12±0.25 | 6.24±2.17 | 9.02±1.22 |
| C5-3 | - | 40.42±0.15 | 45.45±0.36 | 50.11±0.45 |
| C5-4 | - | 37.31±1.61 | 41.54±1.03 | 52.03±0.21 |
| C5-5* | - | 65.06±0.72 | 73.14±0.15 | 94.10±1.01 |
| C5-6 | - | 50.03±0.41 | 68.32±0.65 | 79.05±0.29 |
| C5-7 | - | 44.45±0.78 | 51.08±1.21 | 64.12±1.13 |
| C5-8 | - | 29.10±0.91 | 32.11±0.16 | 44.31±0.27 |
| C5-5-1 | 0 | 0 | 0 | - |
| C5-5-2 | 0 | 0 | 12.18±1.73 | - |
| C5-5-3* | 64.34±0.51 | 82.71±0.28 | 97.58±0.39 | - |
| C5-5-4 | 39.08±0.33 | 41.39±1.11 | 49.67±0.20 | - |

The most bioactive subfractions C5 and C6 derived from chloroform-soluble fraction determined for further isolation of bioactive compound.

a positive control

b the BACE- inhibitory activity test not performed at corresponding concentrations.

*represents the bioactive constituents determined for further isolation.

**Table S2.** Summary of antimicrobial inhibitory activity of chloroform- and ethyl acetate-soluble fractions.

| **Materials** | *E. coli* (G-) | *S. aureus* (G+) | *S. enterica* (G-) | *M. luteus* (G+) | *P. multocida* (G-) | *Cytospora sp.* | *P. piricola* | *F. oxysporum f.* sp. *cucumebrium* |
| --- | --- | --- | --- | --- | --- | --- | --- | --- |
| C3-1 | > 15 | > 15 | > 15 | > 15 | > 15 | > 15 | > 15 | > 15 |
| C3-2 | > 15 | > 15 | > 15 | > 15 | > 15 | > 15 | > 15 | > 15 |
| C3-3* | 0.94 | 3.75 | 1.88 | > 15 | 0.46 | 0.46 | > 15 | > 15 |
| C3-4 | > 15 | > 15 | 7.5 | > 15 | > 15 | 15 | > 15 | 7.5 |
| C3-5 | > 15 | > 15 | > 15 | > 15 | > 15 | > 15 | > 15 | > 15 |
| C3-3-1 | > 15 | > 15 | > 15 | > 15 | > 15 | > 15 | > 15 | > 15 |
| C3-3-2* | 0.46 | 3.75 | 0.94 | 15 | 0.46 | 0.46 | 0.94 | 7.5 |
| C3-3-3 | 1.88 | 7.5 | 7.5 | > 15 | 3.75 | > 15 | > 15 | 3.75 |
| C3-3-2-1 | > 3.75 | -a | > 3.75 | - | 3.75 | > 3.75 | > 3.75 | - |
| C3-3-2-2* | 0.46 | - | 0.46 | - | 0.46 | 0.46 | 0.94 | - |
| E8-1 | > 3.75 | - | > 3.75 | - | > 3.75 | - | > 3.75 | - |
| E8-2 | > 3.75 | - | > 3.75 | - | > 3.75 | - | > 3.75 | - |
| E8-3* | 0.94 | - | 0.94 | - | 0.94 | - | 0.94 | - |
| E8-4 | 1.88 | - | > 3.75 | - | > 3.75 | - | 3.75 | - |
| E8-5 | > 3.75 | - | > 3.75 | - | > 3.75 | - | > 3.75 | - |
| E8-6 | > 3.75 | - | > 3.75 | - | > 3.75 | - | > 3.75 | - |
| E8-3-1 | 3.75 | - | > 3.75 | - | 1.88 | - | > 3.75 | - |
| E8-3-2* | 0.94 | - | 0.94 | - | 0.46 | - | 0.94 | - |
| E8-3-3 | 1.88 | - | > 3.75 | - | 3.75 | - | 3.75 | - |

C and E fractions obtained from chloroform- and ethyl acetate-soluble fraction, respectively.

a the antibacterial or antifungal activity tests not performed for corresponding stains.

*represents the bioactive constituents determined for further isolation. The tested concentrations for subfractions ranged from 15.0 to 0.23 and from 3.75 to 0.23 mg/mL based on the amount of isolates.
